# Supplementary material
Source: PubMed Central journal article supplement (PMC4001541)
Supplement: JCI71856sd.pdf [file JCI71856sd.pdf]

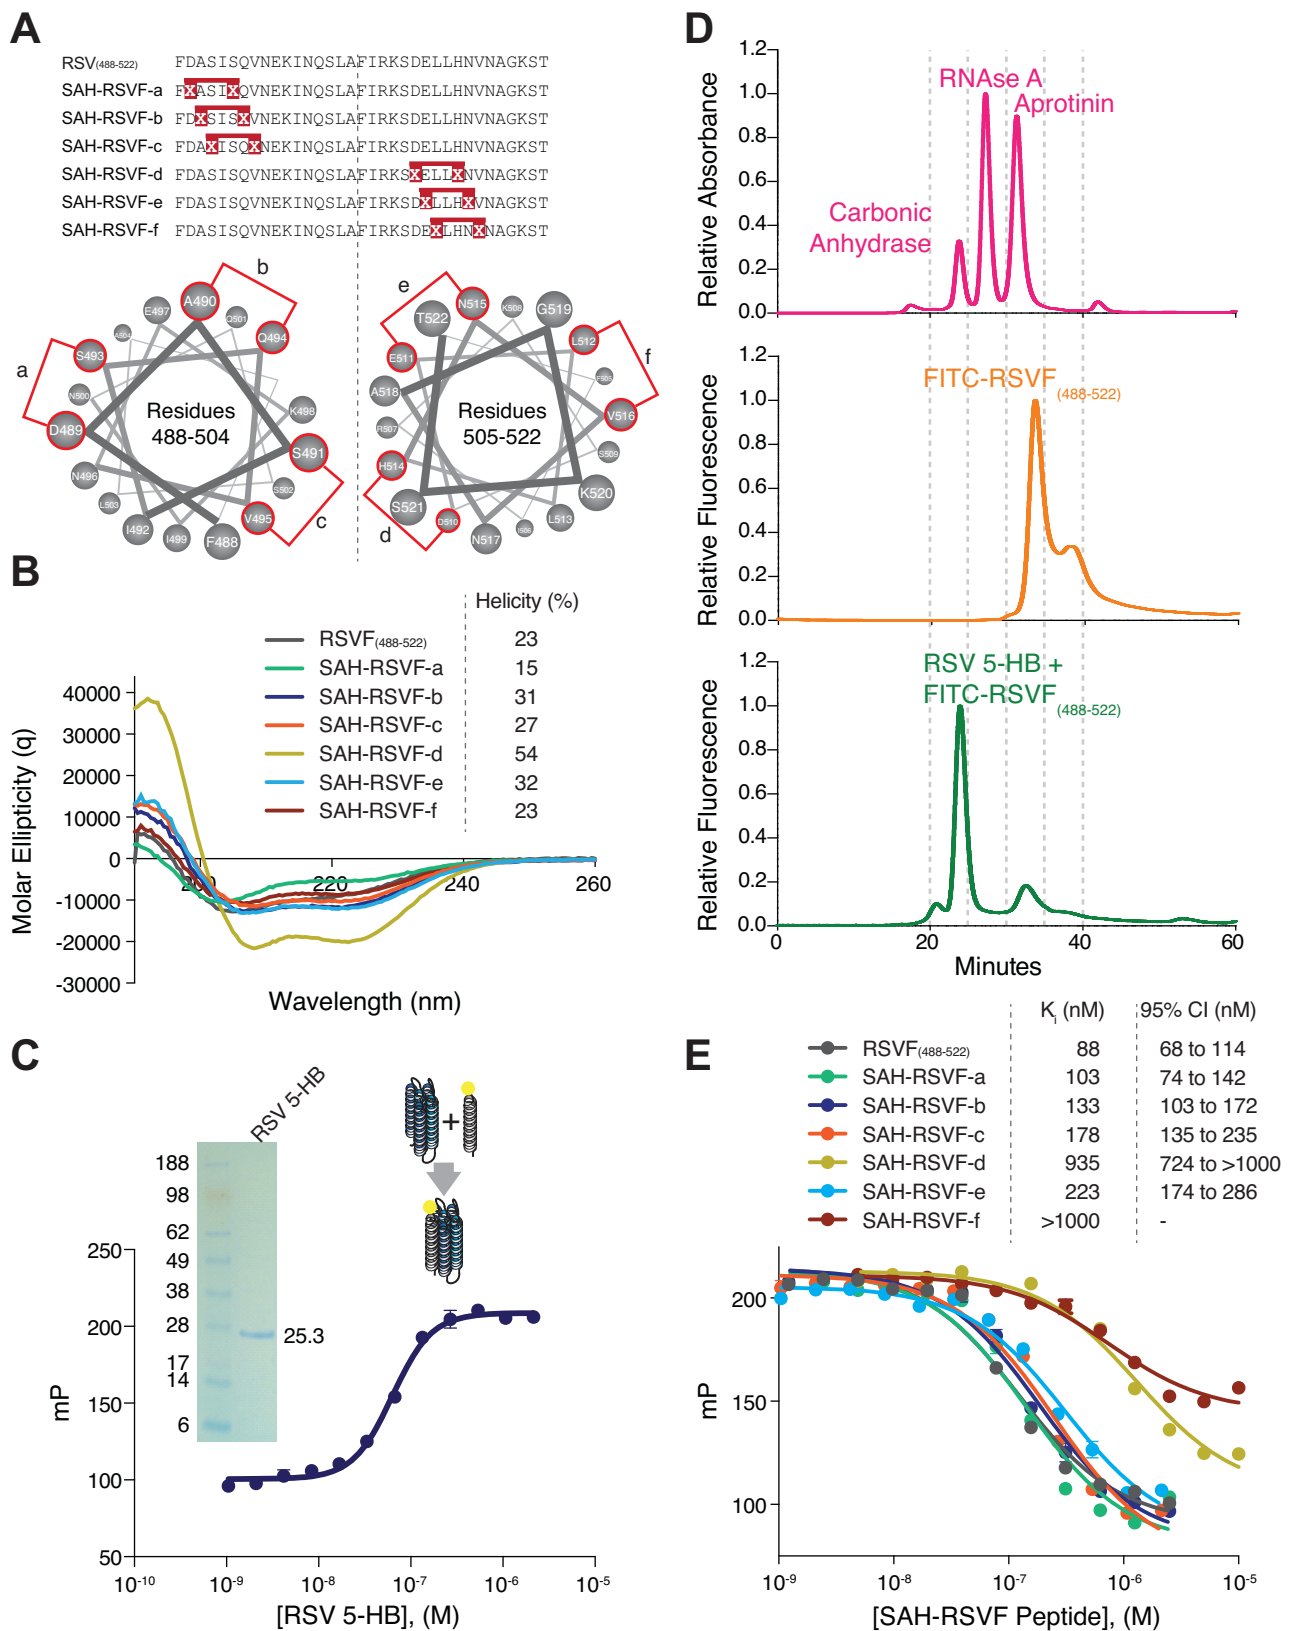

**Supplementary Figure 1: Design, synthesis, and 5-HB binding activity of  $i,i+4$  single stapled SAH-RSVF peptides. (A)** Sequence compositions and staple placement of  $i,i+4$  stapled SAH-RSVF peptides. **(B)** Circular dichroism analysis of  $i,i+4$  stapled SAH-RSVF peptides demonstrating the observed range of  $\alpha$ -helical stabilization by hydrocarbon stapling. **(C)** Development of a fluorescence polarization binding assay to measure affinity to the RSV 5-helix bundle (5-HB). Coomassie stain of the purified recombinant 5-HB is shown. FITC-RSVF bound to 5-HB with a  $K_D$  of 63 nM. Data represent mean  $\pm$  s.e.m. for experiments performed in triplicate. **(D)** Fluorescent size-exclusion chromatography demonstrated that FITC-RSVF elutes as a monomeric species ( $\sim 4$  kD). When mixed with excess 5-HB, the fluorescence FITC-RSVF peak shifts to the expected weight of the peptide-protein complex ( $\sim 29$  kD), confirming formation of a 6-HB species. Molecular weight standards: carbonic anhydrase (29 kDa), RNase A (13.7 kD) and aprotinin (6.5 kD). **(E)** Competitive binding activity of  $i,i+4$  stapled SAH-RSVF peptides against the FITC-RSVF/5-HB interaction. Data represent mean  $\pm$  s.e.m. for experiments performed in triplicate.

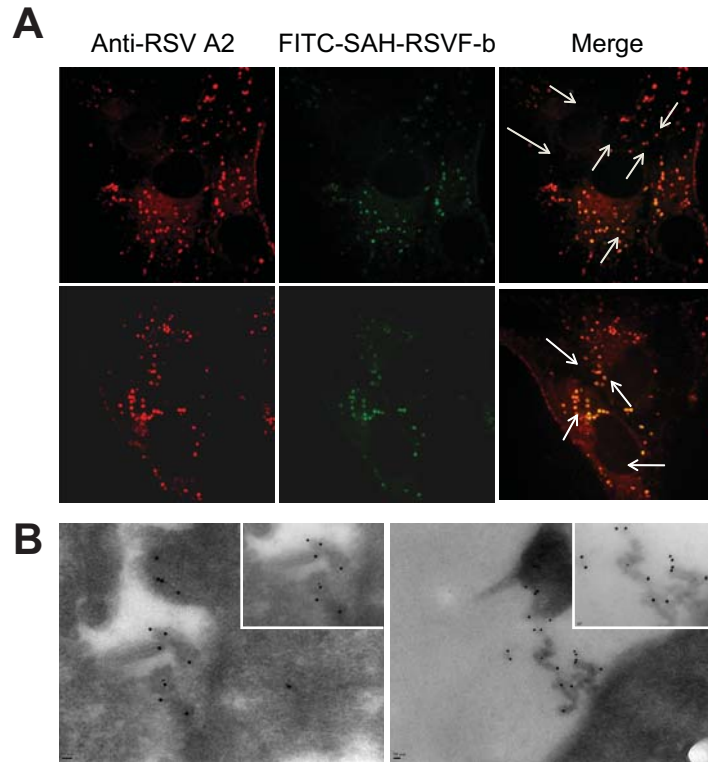

**Supplementary Figure 2:** Colocalization of RSV A2 virus and SAH-RSVF<sub>b</sub> at the plasma membrane of A549 cells. **(A)** Live confocal microscopy documented a striking colocalization of wild-type RSV A2 virus (red) with FITC-labeled SAH-RSVF<sub>b</sub> (green) in discrete punctae, seen as yellow spots in the overlay (marked by white arrows). **(B)** Immunoelectron microscopy demonstrated the localization of FITC-SAH-RSVF<sub>b</sub> (anti-FITC, 15 nm gold) and RSV A2 (anti-His, 5 nm gold) on the plasma membranes of virus-exposed A549 cells.

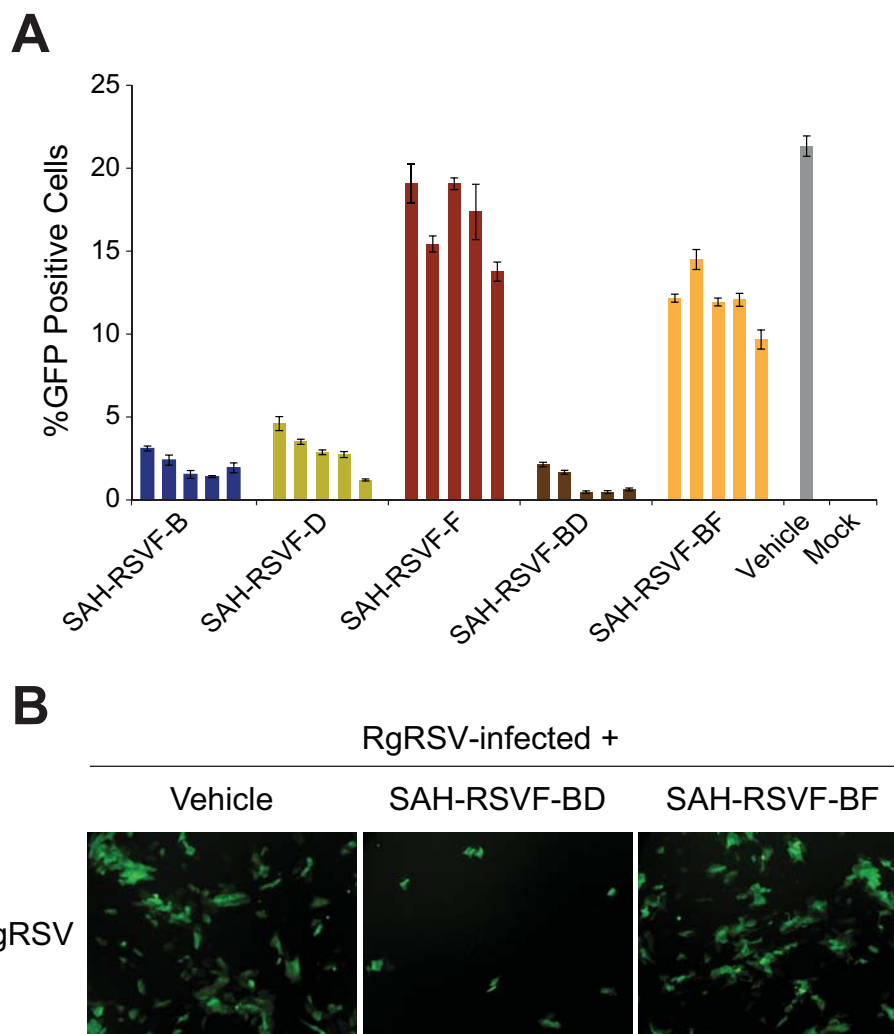

**Supplementary Figure 3:** Inhibition of RSV infection by SAH-RSVF peptides. **(A)** SAH-RSVF constructs containing  $i,i+7$  staples B, D, and BD demonstrated robust viral inhibitory activity over a 1.25 to 15  $\mu\text{M}$  dose range, whereas control peptides F and BF were markedly impaired even at 15  $\mu\text{M}$  dosing. Data represent mean  $\pm$  s.e.m. for experiments performed in triplicate. **(B)** SAH-RSVF<sub>BD</sub> suppressed infection of A549 cells by GFP-labeled rgRSV, as evidenced by decreased cellular fluorescence at 5  $\mu\text{M}$  dosing. Cells treated with the negative control peptide, SAH-RSVF<sub>BF</sub>, demonstrated fluorescence equivalent to vehicle control-treated cells.

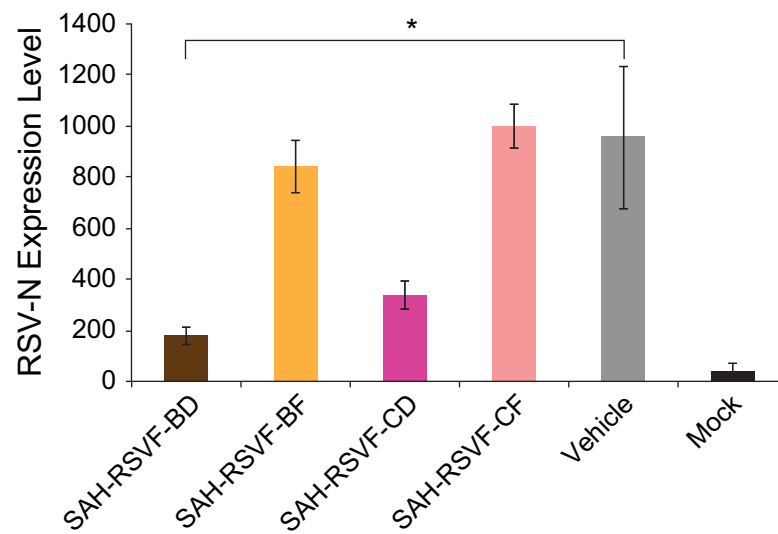

**Supplementary Figure 4:** Effect of SAH-RSVF treatments on RSV-N expression in RSV A2-infected A549 cells. Whereas SAH-RSVF<sub>BF</sub> and SAH-RSVF<sub>CF</sub> had no suppressive effect on RSV-N mRNA levels compared to the untreated control, SAH-RSVF<sub>BD</sub> and SAH-RSVF<sub>CD</sub> peptides significantly reduced RSV-N transcript levels, with SAH-RSVF<sub>BD</sub> manifesting the most potent inhibitory activity. Data are mean ± s.e.m. for experiments performed in triplicate. \*,  $p < 0.001$

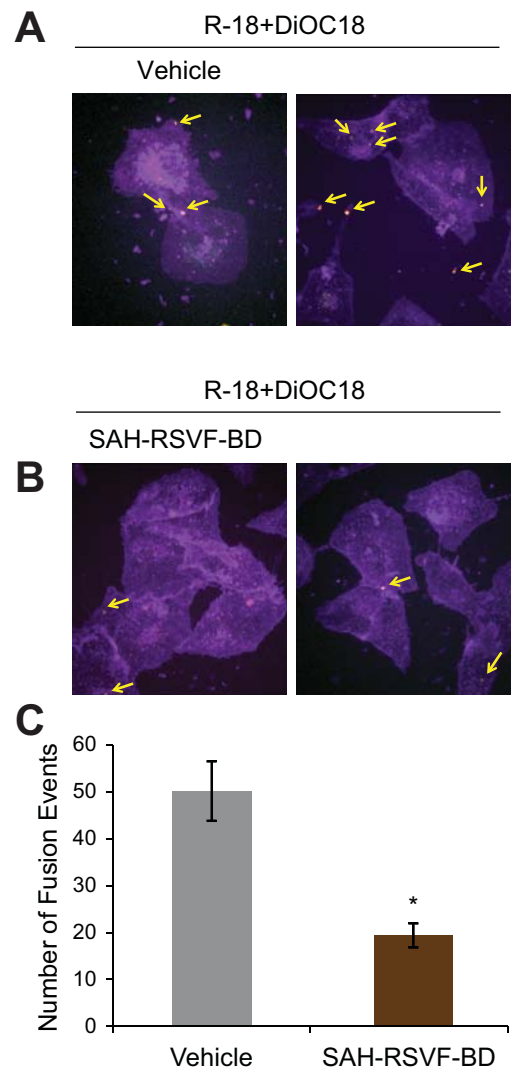

**Supplementary Figure 5:** SAH-RSVF<sub>BD</sub> inhibits viral fusion. R18 and DiOC18 double-labeled RSV A2 virus was applied to A549 cells in the presence of SAH-RSVF<sub>BD</sub> (10  $\mu$ M) or double-labeled RSV A2 alone for a 30 min attachment period and then fusion monitored by confocal microscopy. (**A**, **B**) Exemplary images demonstrate more fusion events in vehicle-treated cells (**A**) compared to SAH-RSVF<sub>BD</sub>-treated cells (**B**). The yellow-orange spots that reflect fusion events (yellow arrows), whereas red spots represent unfused virus. (**C**) Quantitation of yellow-orange spots documented a 60% reduction in fusion events by SAH-RSVF<sub>BD</sub> treatment compared to vehicle. Data represent mean  $\pm$  s.e.m. for experiments performed in triplicate. \*,  $p < 0.0001$

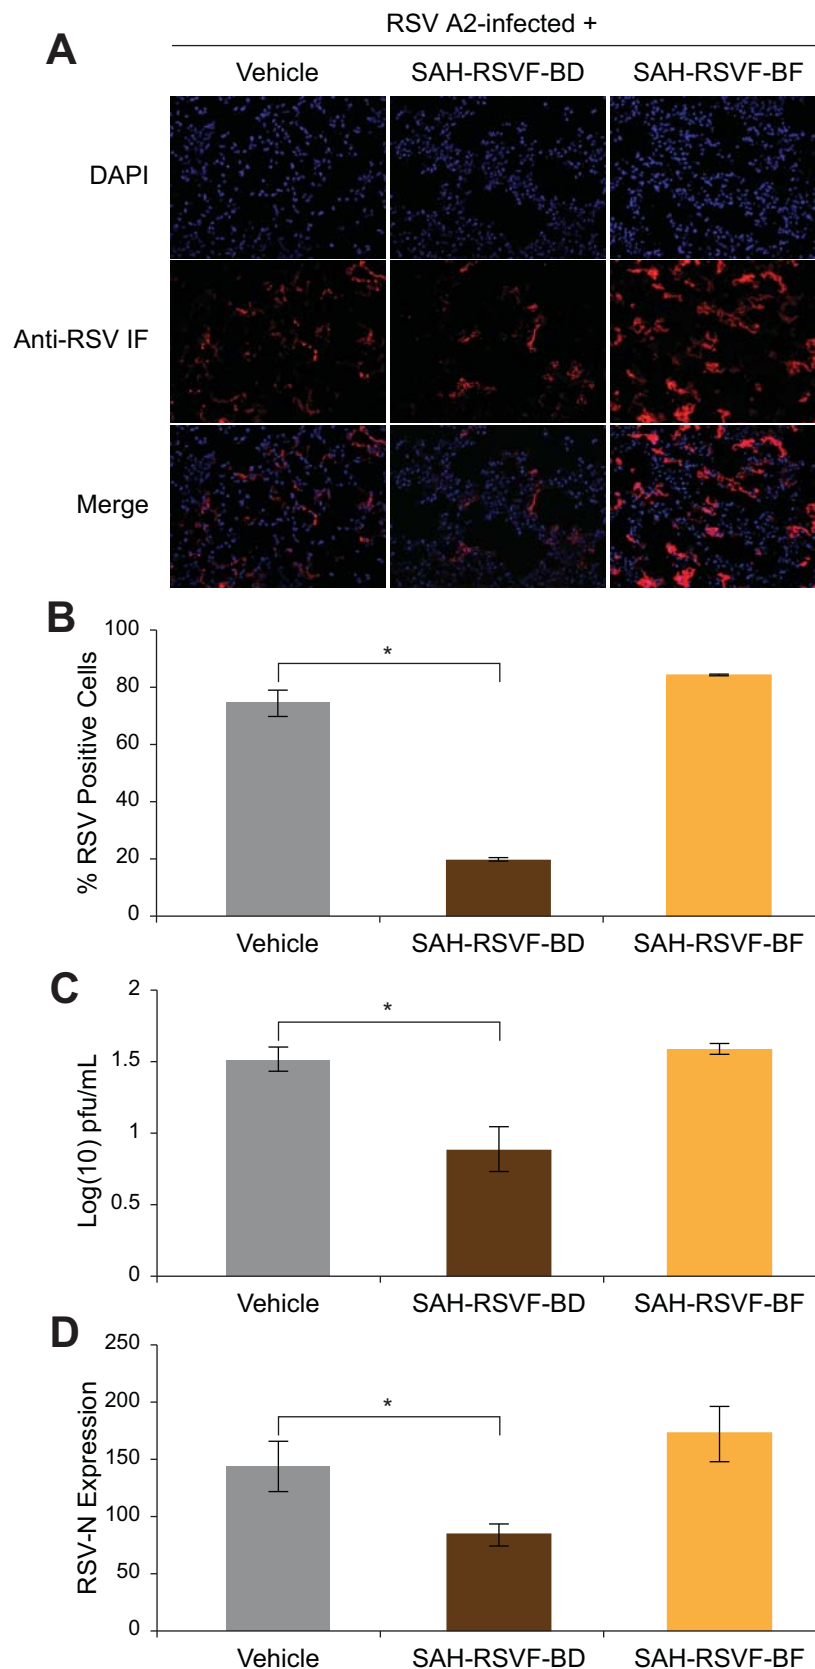

**Supplementary Figure 6:** Intranasal prophylaxis with SAH-RSVF<sub>BD</sub> inhibits spread of RSV infection to the lung. (A) Anti-RSV immunofluorescence microscopy of lung sections from 10 week-old BALB/c mice treated with vehicle and SAH-RSVF peptides (50  $\mu$ L of 125  $\mu$ M solution in 1.2% DMSO) followed by (1) intranasal RSV A2 inoculation ( $1 \times 10^6$  pfu/mouse) 1 hour later, (2) retreatment and reinfection 16 hours after initial infection, and (3) sacrifice 4 days after the second intranasal infection. Original magnification, 20x. (B) Quantitation of average RSV-positivity (red) by Image J analysis of eight images (4 sections) per mouse. Data represent mean percent RSV-positive of total DAPI-positive cells  $\pm$  s.e.m. (C) Viral titers (log<sub>10</sub> pfu/mL) were also measured in the supernatants of lung homogenates by HEP-2 plaque assay. Data are mean  $\pm$  s.e.m. (D) Total RNA was isolated from the lungs (right caudal lobe) of treated mice and RSV-N expression quantitated by RT-PCR. Data are mean  $\pm$  s.e.m. \*,  $p < 0.0001$

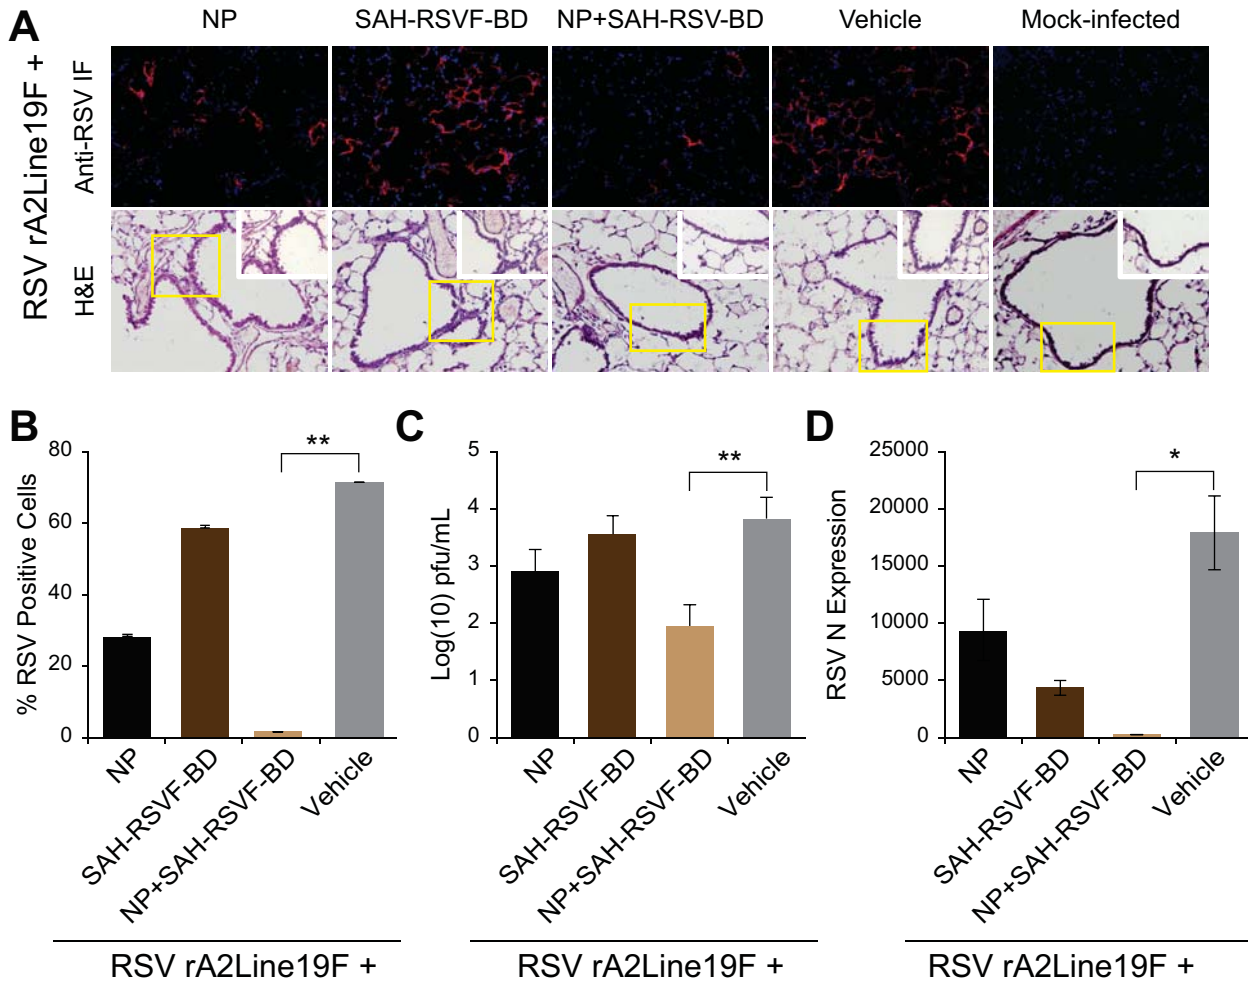

**Supplementary Figure 7: Intratracheal SAH-RSVF<sub>BD</sub> as a nanoparticle preparation inhibits pulmonary RSV infection.** (A) Ten week old BALB/c mice were treated intratracheally with 50  $\mu$ L of vehicle with NP, SAH-RSVF<sub>BD</sub> alone (250  $\mu$ M peptide in 1.2% DMSO), SAH-RSVF<sub>BD</sub> in combination with NP (1:2.5, peptide:NP), or vehicle alone. Seventy-two hours after treatment, the mice were inoculated intranasally with a single dose of recombinant RSV rA2Line19F at  $1 \times 10^6$  pfu/mouse. A control group of mice received 50  $\mu$ L vehicle intratracheally followed by mock inoculation 72 hours later. Mice were sacrificed four days post-infection and 5  $\mu$ m sections from the left lobes of 1% paraformaldehyde perfused and fixed lungs were subjected to anti-RSV immunofluorescence (IF) analysis (red signal indicates RSV virus) and H&E staining. Comparison of H&E-stained lung sections demonstrated decreased inflammatory cell infiltrates in lung tissue from mice treated with the SAH-RSVF<sub>BD</sub>/NP formulation. Yellow squares mark the regions magnified for each inset. Original magnification 20x, insets 40x. (B) Quantitation of average RSV-positivity (red) by Image J analysis of eight images (4 sections) per mouse. Data represent mean percent GFP-positive of total DAPI-positive cells  $\pm$  s.e.m. (C) Viral titers (log<sub>10</sub> pfu/mL) were measured in the supernatants of lung homogenates by HEP-2 plaque assay. Data are mean  $\pm$  s.e.m. (D) Total RNA was isolated from the lungs (right caudal lobe) of treated mice and RSV-N expression quantitated by RT-PCR. Data are mean  $\pm$  s.e.m. \*,  $p < 0.001$ ; \*\*,  $p < 0.0001$
